# Supplementary material for: Highly dispersed ultrafine Pt nanoparticles on hydrophilic N-doped carbon tubes for improved methanol oxidation
Source: Royal Society of Chemistry journal article supplement (doi:10.1039/c3ra43047b), 2013-01-01
Supplement: c3ra43047b.pdf [file c3ra43047b.pdf]

## Electronic Supplementary Information (ESI)

### Highly dispersed ultrafine Pt nanoparticles on hydrophilic N-doped carbon tubes for improved methanol oxidation

Tianbao Zhou<sup>1</sup>, Hui Wang<sup>1</sup>, Julian Key<sup>2</sup>, Shan Ji<sup>2\*\*</sup>, Vladimir Linkov<sup>2</sup>, Rongfang Wang<sup>1\*</sup>

*<sup>a</sup>Key Laboratory of Eco-Environment-Related Polymer Materials, Ministry of Education of China, College of Chemistry and Chemical Engineering, Northwest Normal University, Lanzhou, 730070, China, Fax/ Tel: +869317971533; E-mail: wrf38745779@126.com*

*<sup>b</sup>South African Institute for Advanced Materials Chemistry, University of the Western Cape, Cape Town, 7535, South Africa*

#### Experimental Section

##### Preparation of N-CT support

104 mg of ferric chloride hexahydrate ( $\text{FeCl}_3 \cdot 6\text{H}_2\text{O}$ ) was dissolved in 30 mL of ethanol aqueous solution ( $V_{\text{ethanol}}:V_{\text{H}_2\text{O}} = 2:1$ ), and followed by adding 2 g lysine (as the carbon source) into the solution. The solution was sonicated for 20 min until the lysine was completely dissolved, then further mixed with 426 mg  $\text{SiO}_2^{13}$  to form a suspension, then sonicated for 2 h and the resulting mixture was dried at 80 °C overnight. The mixture was then heated to 300 °C at a rate 5 °C min<sup>-1</sup> under N<sub>2</sub>

---

\*Corresponding author, e-mail: [wrf38745779@126.com](mailto:wrf38745779@126.com), Tel./fax: +86-931-7971533

\*\* Corresponding author, e-mail: [sji@uwc.ac.za](mailto:sji@uwc.ac.za), Tel/fax: +27-21-9599316

atmosphere for 1 h, and then heated to 900 °C for 1 h. The obtained solid products were ground into powders with an agate mortar. In order to remove SiO<sub>2</sub>, the powders were immersed in HF solution ( $V_{\text{HF solution}}:V_{\text{H}_2\text{O}} = 1:1$ ) for 24 h with stirring, then washed with deionized water and dried at 60 °C for 12 h to obtain N-CT.

### **Preparation of Pt/N-CT catalyst**

77.4 mg of sodium citrate was dissolved in 30 mL ethylene glycol (EG) with sonication at room temperature, followed by the addition of 3.36 mL H<sub>2</sub>PtCl<sub>6</sub> (20 mg mL<sup>-1</sup>) solution and further sonication for 20 min, and the mixture was adjusted to ~pH 10 using a 5 wt% KOH/EG solution. The mixture was heated at 160 °C for 6 h and then cooled to the room temperature. 100 mg N-CT treated with 2 mol L<sup>-1</sup> HNO<sub>3</sub> for 48 h was then added to the mixture (total metal loading: 20 wt%) and stirred overnight. The Pt/N-CT powder was collected by filtration, then washed with ethanol, deionized water, and finally dried in an oven at 40 °C for 12 h.

### **Physical characterization**

X-ray diffraction (XRD) was carried out on a Shimadzu XD-3A (Japan), using filtered Cu-K $\alpha$  radiation (40 kV, 30 mA). All X-ray diffraction patterns were analyzed using Jade 7.5 of Material Data, Inc. (MDI): peak profiles of individual reflections were obtained by a nonlinear least-square fit of the Cu-K $\alpha$  corrected data. Scanning electron microscopy (SEM) images were carried out on a Carl Zeiss Ultra Plus microscope. Transmission electron micrographs (TEM) and selected area electron diffraction (SAED) patterns of the N-CN were taken on a JEOL (JEM-2000 FX) microscope operating at 200 kV. Raman spectra were obtained using Ft-Raman

spectroscopy (RFS 100, BRU-KER) employing Nd: YAG laser operating at a wavelength of 1064 nm and a power of 100 mW. The elemental analysis of carbon (C) and nitrogen (N) were conducted using an organic elemental analyzer (Thermo Flash2000). The elemental composition of Pt/N-CT was investigated by EDX coupled to TEM. X-ray photoelectron spectroscopy (XPS) (Phi-5702 America) used a monochromatic Al K $\alpha$  X-ray source ( $h\nu = 1486.6$  eV) was used.

### **Electrochemical characterization**

Electrochemical measurements were carried out using an electrochemical workstation (CHI650D). A common three-electrode electrochemical cell system was used for the measurements. The counter and reference electrode were a platinum wire and an Ag/AgCl (saturated KCl solution) electrode respectively. The working electrode was a glassy carbon disk (5 mm in diameter). The thin-film electrode was prepared as follows: 5 mg of catalyst was dispersed ultrasonically in 1 mL Nafion/ethanol (0.25% Nafion) for 15 min. 8  $\mu$ L of the dispersion was transferred onto the glassy carbon disk using a pipette, and then dried in air. All the experiments were conducted at ambient temperature. For comparison, commercial Pt/C with close metal loading (20%) was purchased from J. M. Corporation.

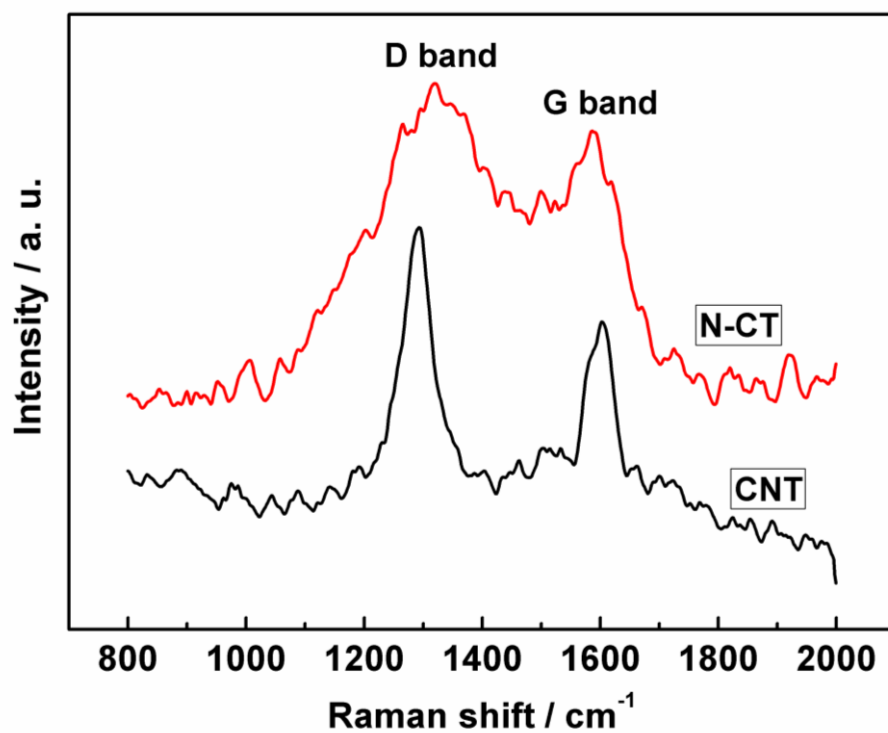

**Fig. S1** Raman spectra of N-CT and CNT.

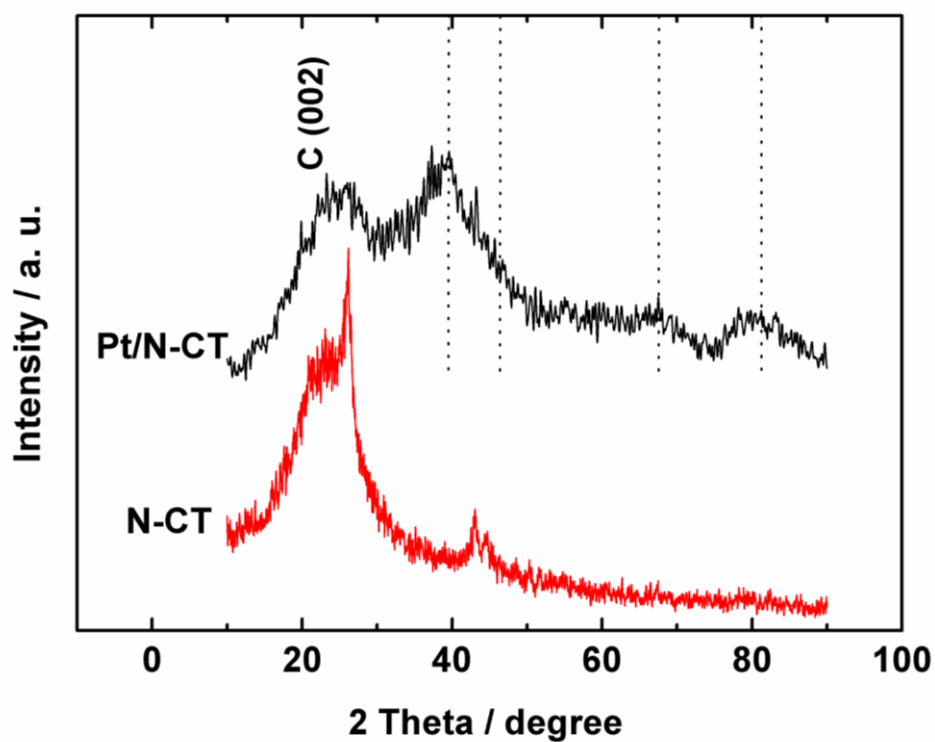

**Fig. S2** XRD patterns of N-CT and Pt/N-CT.

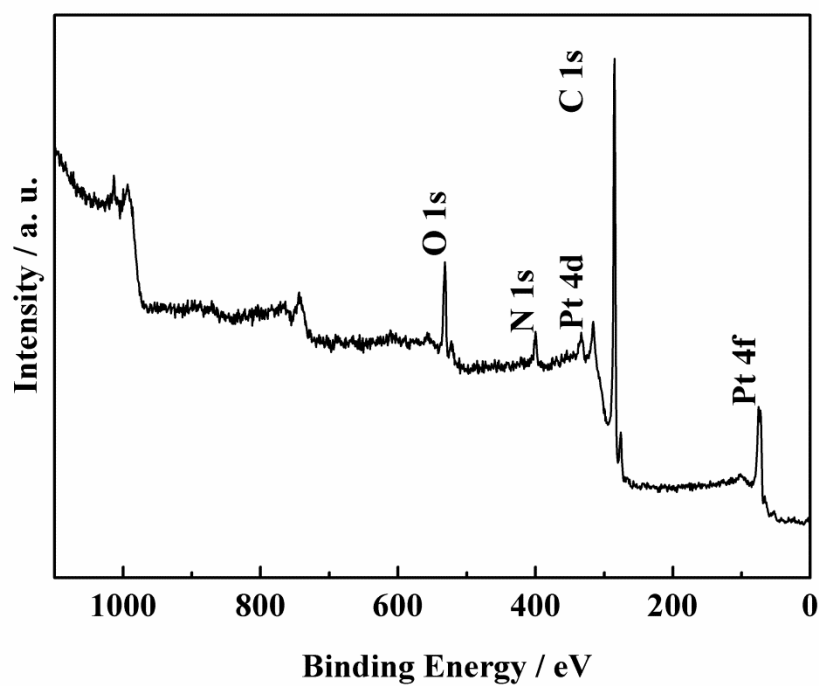

**Fig. S3** XPS spectrum of Pt/N-CT.

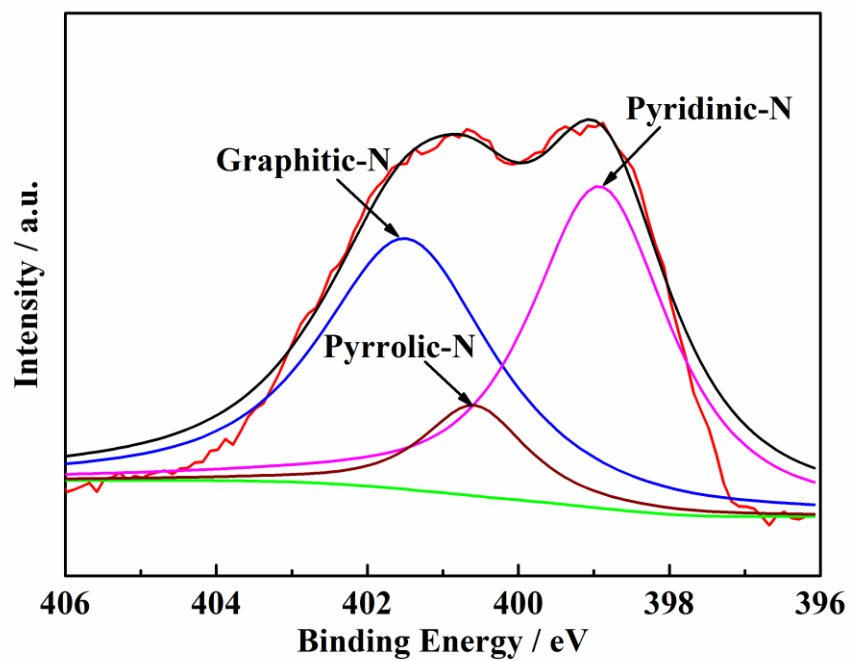

**Fig. S4** N 1s region of N-CT.

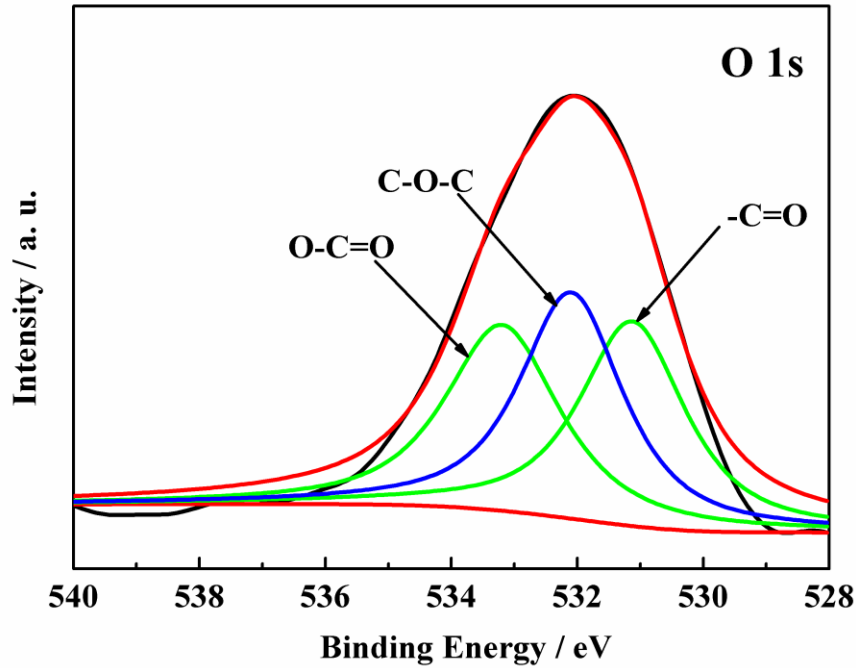

**Fig. S5** O 1s region of Pt/N-CT.

**Table S1** The binding energies and atom ratio (%) of Pt(0), Pt( II) and Pt(IV) at Pt 4f<sub>7/2</sub> of different platinum species.

| Catalyst | Pt 4f <sub>7/2</sub> (eV) |         |        | Atom ratio (%) |         |        |
|----------|---------------------------|---------|--------|----------------|---------|--------|
|          | Pt(0)                     | Pt( II) | Pt(IV) | Pt(0)          | Pt( II) | Pt(IV) |
| Pt/N-CT  | 72.3                      | 73.1    | 71.7   | 87.5           | 8.3     | 4.2    |
| Pt/C     | 71.2                      | 72.1    | 70.7   | 65.0           | 19.4    | 15.6   |

**Table S2** Summary of the electrochemical performance of Pt/N-CT and Pt/C catalysts.

| Catalyst                                                                | Pt/N-CT | Pt/C  |
|-------------------------------------------------------------------------|---------|-------|
| <i>ECSA<sub>H</sub></i> (m <sup>2</sup> g <sup>-1</sup> <sub>Pt</sub> ) | 139.7   | 106.8 |
| The onset potential of methanol oxidation (V)                           | 0.14    | 0.22  |

|                                                                               |       |       |
|-------------------------------------------------------------------------------|-------|-------|
| The peak potential of methanol oxidation (V)                                  | 0.65  | 0.67  |
| The current density of methanol oxidation ( $\text{mA mg}^{-1}_{\text{Pt}}$ ) | 566   | 277   |
| The onset potential of CO oxidation (V)                                       | 0.58  | 0.62  |
| The peak potential of CO oxidation (V)                                        | 0.66  | 0.69  |
| $ECSA_{\text{CO}}$ ( $\text{m}^2 \text{g}^{-1}_{\text{Pt}}$ )                 | 179.4 | 127.8 |

## References

1. R. Wang, X. Li, H. Li, Q. Wang, H. Wang, W. Wang, J. Kang, Y. Chang and Z. Lei, *Int. J. Hydrogen Energy*, 2011, **36**, 5775-5781.
